# Supplementary material for: Improved Subtyping of Avian Influenza Viruses Using an RT-qPCR-Based Low Density Array: ‘Riems Influenza a Typing Array’, Version 2 (RITA-2)
Source: MDPI journal article supplement (doi:10.3390/v14020415), 2022-02-17
Supplement: s1 [file s1]

**Table S1.** Identity of Infectious Bronchitis and Newcastle Disease virus isolates used to validate specific RT-qPCRs.

| <b>Virus species</b> | <b>Strain</b>                 | <b>Patho-/Genotype</b>       |
|----------------------|-------------------------------|------------------------------|
| <b>ND</b>            | ND/713/2016                   | Lasota vaccine/Lentogenic, 2 |
|                      | A/Chicken/Egypt/AR518/2017    | Lentogenic, 2                |
|                      | A/Chicken/Egypt/AR593/2018    | Lentogenic, 2                |
|                      | ND/NR730/2016                 | Velogenic, 7b                |
|                      | A/Chicken/Egypt/AR551/2018    | Velogenic, 7b                |
|                      | A/Chicken/Egypt/AR563/2018    | Velogenic, 7b                |
|                      | A/Chicken/Egypt/AR589/2018    | Velogenic, 7b                |
|                      | A/Chicken/Egypt/AR549/2018    | Velogenic, 7b                |
| <b>IBV</b>           | AI20298/2019                  | 4/91 IBV vaccine/793B        |
|                      | A/Chicken/Egypt/AR545/2018    | Egyptian variant 2           |
|                      | A/Chicken/Egypt/AR63/2018     | Egyptian variant 2           |
|                      | A/Chicken/Egypt/AR593/2018    | Egyptian variant 2           |
|                      | A/Chicken/Egypt/AI20290/2019  | Egyptian variant 2           |
|                      | A/Chicken/Egypt/ AI20293/2019 | Egyptian variant 2           |
|                      | A/Chicken/Egypt/ AI20297/2019 | Egyptian variant 2           |

**Table S2.** Analysis of clincial samples obtained during active or passive monitoring of wild birds and poultry in Germany, 2020-21.

| Sample id.  | Species                | Subtype <sup>1</sup> | Pathotype | H5-8                         | H7-8    | RITA-2  | Cq    |
|-------------|------------------------|----------------------|-----------|------------------------------|---------|---------|-------|
| 2020AI01301 | Mallard                | H1N1                 |           | HxN1                         | HxN1    | H1N1    | 26.46 |
| 2020AI01399 | Mallard                | H1N2                 |           | HxN2                         | HxNx    | H1N2    | 30.62 |
| 2020AI01045 | Mallard                | H2N5                 |           | HxNx                         | HxNx    | H2N5    | 35.53 |
| 2020AI01071 | Mallard                | H3N8                 |           | HxN8                         | HxNx    | H3N8    | 31.13 |
| 2020AI00046 | Tufted duck            | H5N1                 | LP        | H5LPN1                       | nt      | H5N1    | 25    |
| 2020AI03671 | Greyleg goose          | H5N1                 | HP        | H5N1                         | nt      | H5N1    | 33.05 |
| 2021AI01598 | Greyleg goose          | H5N1                 | HP        | H5(HP, 2344b)N1              | nt      | H5N1    | 32.36 |
| 2021AI01602 | Chicken                | H5N1                 | HP        | H5(HP, 2344b)N1              | nt      | H5N1    | 15.69 |
| 2021AI01605 | Barnacle goose         | H5N1                 | HP        | H5(HP, 2344b)N1              | nt      | H5N1    | 26.81 |
| 2021AI03752 | Barnacle goose         | H5N1                 | HP        | H5(HP, 2344b)N1              | nt      | H5N1    | 24.16 |
| 2021AI03933 | Chicken                | H5N1                 | HP        | H5(HP, 2344b)N1              | nt      | H5N1    | 18.24 |
| 2021AI03934 | Chicken                | H5N1                 | HP        | H5(HP, 2344b)N1              | nt      | H5N1    | 20.99 |
| 2020AI01397 | Mallard                | H5N2                 | LP        | H5(LP)N2                     | nt      | H5N2    | 29.07 |
| 2020AI01462 | Mute swan              | H5N3                 | LP        | H5LPN3                       | nt      | H5N3    | 31.75 |
| 2020AI03422 | Red knot               | H5N3                 | HP        | H5(HP, 2344b)N1              | nt      | H5N3    | 28.23 |
| 2021AI00094 | Red knot               | H5N3                 | HP        | H5                           | nt      | H5N3    | 32.63 |
| 2021AI00382 | Common buzzard         | H5N3                 | HP        | H5(HP, 2344b)N3              | nt      | H5N3    | 25.09 |
| 2021AI00394 | Red knot               | H5N3                 | HP        | H5(HP, 2344b)N3              | nt      | H5N3    | 26.05 |
| 2021AI01068 | Red knot               | H5N3                 | HP        | H5(HP, 2344b)N3              | nt      | H5N3    | 22.90 |
| 2021AI01736 | Peregrine falcon       | H5N3                 | HP        | H5(HP, 2344b)N3              | nt      | H5N3    | 23.12 |
| 2021AI01497 | Gull                   | H5N4                 | HP        | H5(HP, 2344b)Nx <sup>2</sup> | nt      | H5N4    | 33.05 |
| 2021AI01498 | Mute swan              | H5N4                 | HP        | H5(HP, 2344b)Nx <sup>2</sup> | nt      | H5N4    | 27.05 |
| 2021AI01743 | Tufted duck            | H5N4                 | HP        | H5(HP, 2344b)Nx <sup>2</sup> | nt      | H5N4    | 35.93 |
| 2021AI01766 | Peregrine falcon       | H5N4                 | HP        | H5(HP, 2344b)Nx <sup>2</sup> | nt      | H5N4    | 33.76 |
| 2020AI02166 | Common buzzard         | H5N5                 | HP        | H5(HP, 2344b)Nx <sup>2</sup> | nt      | H5N5    | 16.28 |
| 2020AI02246 | Eurasian wigeon        | H5N5                 | HP        | H5(HP, 2344b)Nx <sup>2</sup> | nt      | H5N5    | 31.59 |
| 2020AI02255 | Bean goose             | H5N5                 | HP        | H5(HP, 2344b)Nx <sup>2</sup> | nt      | H5N5    | 21.75 |
| 2020AI02419 | Chicken                | H5N5                 | HP        | H5(HP, 2344b)Nx <sup>2</sup> | nt      | H5N5    | 28.05 |
| 2020AI02170 | White-tailed sea eagle | H5N5/N8              | HP        | H5(HP, 2344b)N8              | nt      | H5N5/N8 | 27.04 |
| 2020AI02196 | Barnacle goose         | H5N5/N8              | HP        | H5(HP, 2344b)N8              | nt      | H5N5/N8 | 20.89 |
| 2020AI00326 | Turkey                 | H5N8                 | HP        | H5(HP, 2344b)N8              | nt      | H5N8    | 21.20 |
| 2020AI00350 | Turkey                 | H5N8                 | HP        | H5(HP, 2344b)N8              | nt      | H5N8    | 23.14 |
| 2020AI02315 | Curlew                 | H5N8                 | HP        | H5(HP, 2344b)N8              | nt      | H5N8    | 19.93 |
| 2020AI03043 | Crescent sandpiper     | H5N8                 | HP        | H5(HP2344b)N8                | nt      | H5N8    | 24.78 |
| 2020AI03056 | Mallard                | H5N8                 | HP        | H5(HP, 2344b)N8              | nt      | H5N8    | 24.57 |
| 2020AI03433 | Turkey                 | H5N8                 | HP        | H5(HP, 2344b)N8              | nt      | H5N8    | 21.35 |
| 2021AI00092 | Barnacle goose         | H5N8                 | HP        | H5(HP, 2344b)N8              | nt      | H5N8    | 21.66 |
| 2021AI00383 | Greyleg goose          | H5N8                 | HP        | H5(HP, 2344b)N8              | nt      | H5N8    | 22.98 |
| 2021AI00385 | Laughing gull          | H5N8                 | HP        | H5(HP, 2344b)N8              | nt      | H5N8    | 25.63 |
| 2021AI00386 | Kestrel                | H5N8                 | HP        | H5(HP, 2344b)N8              | nt      | H5N8    | 22.98 |
| 2021AI01495 | Barnacle goose         | H5N8                 | HP        | H5(HP, 2344b)N8              | nt      | H5N8    | 27.32 |
| 2021AI01737 | Peregrine falcon       | H5N8                 | HP        | H5(HP, 2344b)N8/N3           | nt      | H5N8    | 30.87 |
| 2021AI01742 | Eagle owl              | H5N8                 | HP        | H5(HP, 2344b)N8              | nt      | H5N8    | 28.60 |
| 2021AI01752 | Great cormorant        | H5N8                 | HP        | H5(HP, 2344b)N8              | nt      | H5N8    | 32.06 |
| 2021AI02466 | Mute swan              | H5N8                 | HP        | H5(HP, 2344b)N8              | nt      | H5N8    | 20.78 |
| 2020AI02379 | Barnacle goose         | H5N8/N5              | HP        | H5(HP, 2344b)N8              | nt      | H5N8/N5 | 24.93 |
| 2020AI02279 | Eurasian wigeon        | H5Nx                 | HP        | H5(HP, 2344b)N8              | nt      | H5Nx    | 30.55 |
| 2021AI00432 | Turkey                 | H6N1                 |           | HxN1                         | HxN1    | H6N1    | 27.88 |
| 2021AI02559 | Dwarf chicken          | H7N3                 | LP        | nt                           | LP H7N3 | nt      | 28.32 |
| 2021AI02560 | Dwarf chicken          | H7N3                 | LP        | nt                           | LP H7N3 | nt      | 28.52 |
| 2021AI02561 | Dwarf chicken          | H7N3                 | LP        | nt                           | LP H7N3 | H7N3    | 28.52 |
| 2021AI03100 | Domestic duck          | H7N3                 | LP        | nt                           | LP H7N3 | H7N3    | 32.69 |
| 2020AI03226 | Mallard                | H7N7                 | LP        | nt                           | LP H7N7 | H7N7    | 27.70 |
| 2020AI02242 | Mallard                | H8N4                 |           | nt                           | HxNx    | H8N4    | 32.58 |
| 2020AI01400 | Mallard                | H9N1                 |           | HxN1                         | nt      | H9N1    | 29.42 |
| 2020AI01047 | Mute swan              | H9N8                 |           | HxN8                         | HxNx    | H9N8    | 32.23 |
| 2020AI01693 | Mallard                | H10N6                |           | HxN6                         | HxNx    | H10N6   | 29.14 |
| 2020AI01055 | Mallard                | H11(?)N9             |           | nt                           | HxN9    | H11N9   | 29.54 |
| 2020AI01469 | Mute swan              | H11N1                |           | HxN1                         | HxN1    | H11N1   | 24.48 |
| 2020AI03651 | Mallard                | H12N2                |           | HxN2                         | HxNx    | H12N2   | 32.30 |
| 2020AI01401 | Weißohrturako          | H12N5                |           | HxN5                         | HxNx    | H12N5   | 25.39 |
| 2020AI02736 | Herring gull           | H13N2                |           | HxN2                         | nt      | H13N2   | 23.84 |

<sup>1</sup> – Subtype determined according to single RT-qPCRs and/or partial HA/NA sequencing.

2 – N4 and N5 RT-qPCRs had not been included in the H5-8 array when these samples were tested.

nt – not tested.

Cq – threshold value obtained with the generic M-RTqPCR included in the RITA-2 assay

**Table S3.** Summary statistics of intra- and interassay variations of the RITA-2 array.

| Subtype | Intra-assay variation |       |         |       | Inter-assay variation |       |       |
|---------|-----------------------|-------|---------|-------|-----------------------|-------|-------|
|         | Day one               |       | Day two |       | Mean                  | SD    | CV%   |
|         | SD                    | CV%   | SD      | CV%   |                       |       |       |
| H1      | 0.007                 | 0.036 | 0.007   | 0.036 | 19.47                 | 0.023 | 0.122 |
| H2      | 0.007                 | 0.035 | 0.007   | 0.035 | 19.69                 | 0.018 | 0.092 |
| H3      | 0.014                 | 0.082 | 0.028   | 0.164 | 17.17                 | 0.044 | 0.258 |
| H4      | 0.007                 | 0.037 | 0.056   | 0.303 | 18.65                 | 0.034 | 0.182 |
| H5      | 0.007                 | 0.021 | 0.014   | 0.043 | 32.64                 | 0.012 | 0.038 |
| H6      | 0.007                 | 0.024 | 0.098   | 0.344 | 28.67                 | 0.075 | 0.263 |
| H7      | 0.007                 | 0.049 | 0.007   | 0.049 | 14.24                 | 0.058 | 0.407 |
| H8      | 0.035                 | 0.149 | 0.056   | 0.238 | 23.69                 | 0.046 | 0.196 |
| H9      | 0.007                 | 0.038 | 0.014   | 0.077 | 18.30                 | 0.009 | 0.052 |
| H10     | 0.070                 | 0.361 | 0.007   | 0.036 | 19.54                 | 0.045 | 0.234 |
| H11     | 0.021                 | 0.114 | 0.014   | 0.076 | 18.49                 | 0.015 | 0.081 |
| H12     | 0.014                 | 0.082 | 0.028   | 0.165 | 17.08                 | 0.021 | 0.126 |
| H13     | 0.014                 | 0.072 | 0.056   | 0.291 | 19.39                 | 0.033 | 0.173 |
| H14     | 0.007                 | 0.036 | 0.007   | 0.036 | 19.17                 | 0.023 | 0.124 |
| H15     | 0.007                 | 0.025 | 0.028   | 0.102 | 27.62                 | 0.035 | 0.130 |
| H16     | 0.014                 | 0.082 | 0.021   | 0.124 | 17.09                 | 0.020 | 0.120 |
| N1      | 0.069                 | 0.319 | 0.014   | 0.065 | 21.62                 | 0.068 | 0.318 |
| N2      | 0.056                 | 0.261 | 0.014   | 0.065 | 21.60                 | 0.033 | 0.155 |
| N3      | 0.021                 | 0.108 | 0.042   | 0.216 | 19.60                 | 0.046 | 0.236 |
| N4      | 0.042                 | 0.228 | 0.007   | 0.038 | 18.59                 | 0.026 | 0.141 |
| N5      | 0.049                 | 0.264 | 0.021   | 0.113 | 18.68                 | 0.046 | 0.249 |
| N6      | 0.028                 | 0.151 | 0.070   | 0.380 | 18.63                 | 0.059 | 0.320 |
| N7      | 0.056                 | 0.390 | 0.063   | 0.439 | 14.47                 | 0.051 | 0.353 |
| N8      | 0.035                 | 0.174 | 0.028   | 0.140 | 20.18                 | 0.033 | 0.163 |
| N9      | 0.021                 | 0.124 | 0.056   | 0.331 | 17.07                 | 0.040 | 0.236 |
| ND      | 0.007                 | 0.028 | 0.021   | 0.086 | 24.43                 | 0.042 | 0.173 |
| IBV     | 0.077                 | 0.295 | 0.028   | 0.107 | 26.27                 | 0.072 | 0.276 |

**Table S4.** Raw data of inter- and intra-assay variations.

| Subtype | Day one  |          |       | Day two  |          |       |
|---------|----------|----------|-------|----------|----------|-------|
|         | Cq value | Cq value | Mean  | Cq value | Cq value | Mean  |
| H1      | 19.45    | 19.46    | 19.45 | 19.50    | 19.49    | 19.49 |
| H2      | 19.70    | 19.71    | 19.70 | 19.68    | 19.67    | 19.67 |
| H3      | 17.13    | 17.15    | 17.14 | 17.23    | 17.19    | 17.21 |
| H4      | 18.65    | 18.64    | 18.64 | 18.70    | 18.62    | 18.66 |
| H5      | 32.65    | 32.66    | 32.65 | 32.63    | 32.65    | 32.64 |
| H6      | 28.64    | 28.63    | 28.63 | 28.79    | 28.65    | 28.72 |
| H7      | 14.30    | 14.29    | 14.29 | 14.20    | 14.19    | 14.19 |
| H8      | 23.65    | 23.70    | 23.67 | 23.76    | 23.68    | 23.72 |
| H9      | 18.31    | 18.30    | 18.30 | 18.29    | 18.31    | 18.3  |
| H10     | 19.61    | 19.51    | 19.56 | 19.53    | 19.52    | 19.52 |
| H11     | 18.51    | 18.48    | 18.49 | 18.50    | 18.48    | 18.49 |
| H12     | 17.08    | 17.10    | 17.09 | 17.09    | 17.05    | 17.07 |
| H13     | 19.38    | 19.40    | 19.39 | 19.35    | 19.43    | 19.39 |
| H14     | 19.19    | 19.20    | 19.19 | 19.15    | 19.16    | 19.15 |
| H15     | 27.65    | 27.66    | 27.65 | 27.62    | 27.58    | 27.6  |
| H16     | 17.10    | 17.12    | 17.11 | 17.10    | 17.07    | 17.08 |
| N1      | 21.62    | 21.72    | 21.67 | 21.59    | 21.57    | 21.58 |
| N2      | 21.56    | 21.64    | 21.60 | 21.59    | 21.61    | 21.6  |
| N3      | 19.62    | 19.65    | 19.63 | 19.54    | 19.60    | 19.57 |
| N4      | 18.57    | 18.63    | 18.60 | 18.58    | 18.59    | 18.58 |
| N5      | 18.75    | 18.68    | 18.71 | 18.64    | 18.67    | 18.65 |
| N6      | 18.69    | 18.65    | 18.67 | 18.65    | 18.55    | 18.6  |
| N7      | 14.53    | 14.45    | 14.49 | 14.51    | 14.42    | 14.46 |
| N8      | 20.23    | 20.18    | 20.20 | 20.15    | 20.19    | 20.17 |
| N9      | 17.11    | 17.08    | 17.09 | 17.10    | 17.02    | 17.06 |
| ND      | 24.40    | 24.39    | 24.39 | 24.45    | 24.48    | 24.46 |
| IBV     | 26.38    | 26.27    | 26.32 | 26.25    | 26.21    | 26.23 |

.
